# Supplementary material for: Nitrosyl induces phosphorous-acid dissociation in ruthenium(ii)
Source: Royal Society of Chemistry journal article supplement (doi:10.1039/c1dt10936g), 2011-01-01
Supplement: c1dt10936g.pdf [file c1dt10936g.pdf]

## Supplementary Information

# Nitrosyl induces phosphorous-acid dissociation in ruthenium(II)†

Daniela Ramos Truzzi,<sup>a</sup> Antonio Gilberto Ferreira,<sup>b</sup> Sebastião Claudino da Silva,<sup>c</sup>  
Francisco das Chagas Alves Lima<sup>d</sup> and Douglas Wagner Franco<sup>\*a</sup>

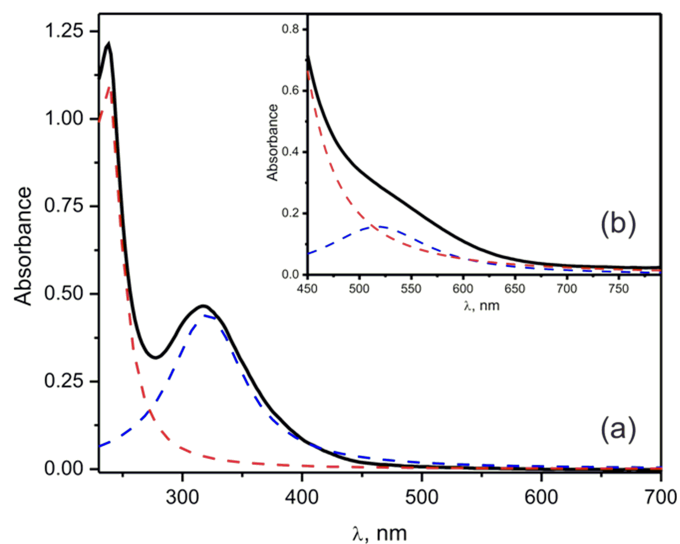

**Fig SI 1** Electronic spectrum of *trans*-[Ru(NO<sup>+</sup>)(NH<sub>3</sub>)<sub>4</sub>P(OH)<sub>3</sub>]<sup>3+</sup> at 0.5 mol L<sup>-1</sup> CF<sub>3</sub>COOH and 25±0.05°C (a) C<sub>Ru</sub> = 3.70×10<sup>-4</sup> mol L<sup>-1</sup> and optical path of 1.0 cm (b) C<sub>Ru</sub> = 3.54×10<sup>-3</sup> mol L<sup>-1</sup> and optical path of 5.0 cm.

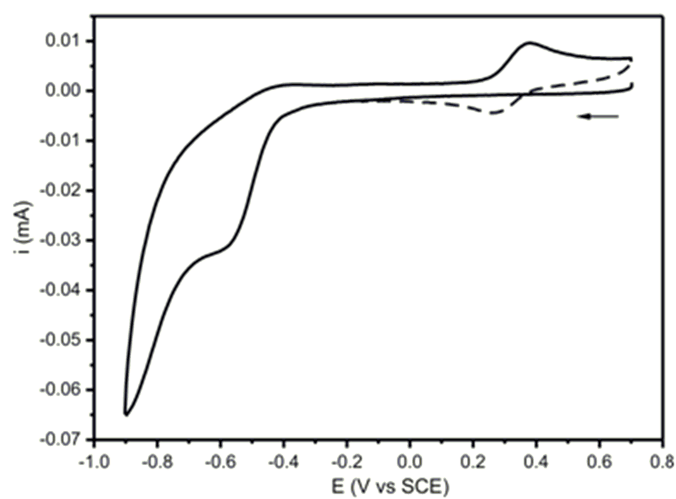

**Fig. SI 2.** Cyclic voltammogram of  $trans\text{-}[\text{Ru}(\text{NO}^+)(\text{NH}_3)_4\text{P}(\text{OH})_3]^{3+}$  at  $0.5 \text{ mol L}^{-1} \text{ CF}_3\text{COOH}$ ,  $v = 50 \text{ mV s}^{-1}$  and  $C_{\text{Ru}} = 1.0 \times 10^{-3} \text{ mol L}^{-1}$ , at  $25 \pm 0.5^\circ\text{C}$ ; solid line: 1<sup>st</sup> cycle; dashed line: 2<sup>nd</sup> cycle.

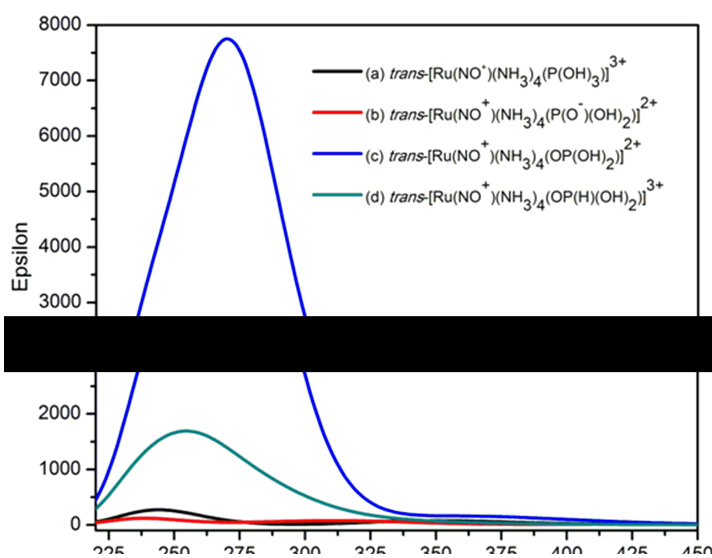

**Fig. SI 3** Calculated TD-DFT electronic spectra for the structures A, B, C and D.

**Table SI 1** Geometric parameters (bond length, Å, and angle, °) for the phosphorous-acid complexes

| (a)                |         | (b)                 |         | (c)                |         | (d)                |         |
|--------------------|---------|---------------------|---------|--------------------|---------|--------------------|---------|
| Ru-NO <sup>+</sup> | 1.840 Å | Ru-NO <sup>+</sup>  | 1.856 Å | Ru-NO <sup>+</sup> | 1.802 Å | Ru-NO <sup>+</sup> | 1.798 Å |
| Ru-P               | 2.477 Å | Ru-P                | 2.467 Å | Ru-O               | 2.057 Å | Ru-O               | 2.071 Å |
| N O                | 1.126 Å | N O                 | 1.127 Å | N O                | 1.132 Å | N O                | 1.129 Å |
| P-OH               | 1.596 Å | P-OH                | 1.618 Å | P-OH               | 1.653 Å | P-OH               | 1.600 Å |
|                    |         | P-O <sup>-</sup>    | 1.535 Å | P-O                | 1.582 Å | P=O                | 1.543 Å |
| Ru-N O             | 178.94° | Ru-N O              | 178.02° | Ru-N O             | 179.13° | Ru-N O             | 179.31° |
| Ru-P-OH            | 108.55° | Ru-P-O <sup>-</sup> | 116.51° | Ru-O-P             | 139.19° | Ru-O=P             | 143.67° |

**Table SI 2** Atomic coordinates ( $\times 10^4$ ) and equivalent isotropic displacement parameters ( $\text{Å}^2 \times 10^3$ ),  $U(\text{eq})$  is defined as one third of the trace of the orthogonalized  $U^{\text{ij}}$  tensor

| Atom  | x        | y       | z       | U(eq) |
|-------|----------|---------|---------|-------|
| Ru    | 9182(1)  | 1324(1) | 1385(1) | 29(1) |
| P     | 6782(1)  | 545(1)  | 1275(1) | 30(1) |
| O     | 11795(5) | 2343(2) | 1206(4) | 56(1) |
| O(1)  | 7436(4)  | -32(1)  | 565(3)  | 37(1) |
| O(2)  | 6021(5)  | 428(1)  | 2850(3) | 50(1) |
| O(3)  | 4985(4)  | 813(1)  | 445(3)  | 42(1) |
| N(1)  | 9727(5)  | 1054(2) | -773(3) | 38(1) |
| N(2)  | 6996(5)  | 1906(2) | 601(4)  | 46(1) |
| N(3)  | 8441(5)  | 1504(2) | 3557(4) | 40(1) |
| N(4)  | 11066(5) | 645(2)  | 2198(4) | 38(1) |
| N(5)  | 10871(5) | 1930(2) | 1329(3) | 35(1) |
| Zn    | 3706(1)  | 1321(1) | 6157(1) | 38(1) |
| Cl(1) | 1357(2)  | 631(1)  | 5871(1) | 50(1) |
| Cl(2) | 3765(2)  | 1854(1) | 4027(1) | 46(1) |
| Cl(3) | 6462(2)  | 858(1)  | 6653(2) | 72(1) |
| Cl(4) | 3023(2)  | 1983(1) | 7979(1) | 55(1) |

**Table SI 3** Hydrogen coordinates ( $\times 10^4$ ) and isotropic displacement parameters ( $\text{\AA}^2 \times 10^3$ )

| <b>Atom</b> | <b>x</b> | <b>y</b> | <b>z</b> | <b>U(eq)</b> |
|-------------|----------|----------|----------|--------------|
| H(2)        | 6664     | 164      | 3250     | 75           |
| H(3)        | 4318     | 536      | 130      | 64           |
| H(1A)       | 10423    | 1335     | -1202    | 46           |
| H(1B)       | 8628     | 1009     | -1265    | 46           |
| H(1C)       | 10356    | 705      | -760     | 46           |
| H(2A)       | 6388     | 2063     | 1349     | 55           |
| H(2B)       | 6179     | 1698     | 41       | 55           |
| H(2C)       | 7502     | 2202     | 83       | 55           |
| H(3A)       | 9394     | 1394     | 4156     | 48           |
| H(3B)       | 7400     | 1296     | 3767     | 48           |
| H(3C)       | 8215     | 1897     | 3660     | 48           |
| H(4A)       | 12114    | 818      | 2572     | 46           |
| H(4B)       | 11377    | 399      | 1478     | 46           |
| H(4C)       | 10494    | 435      | 2887     | 46           |
